# Supplementary material
Source: PubMed Central journal article supplement (PMC4347365)
Supplement: SD4.pdf [file SD4.pdf]

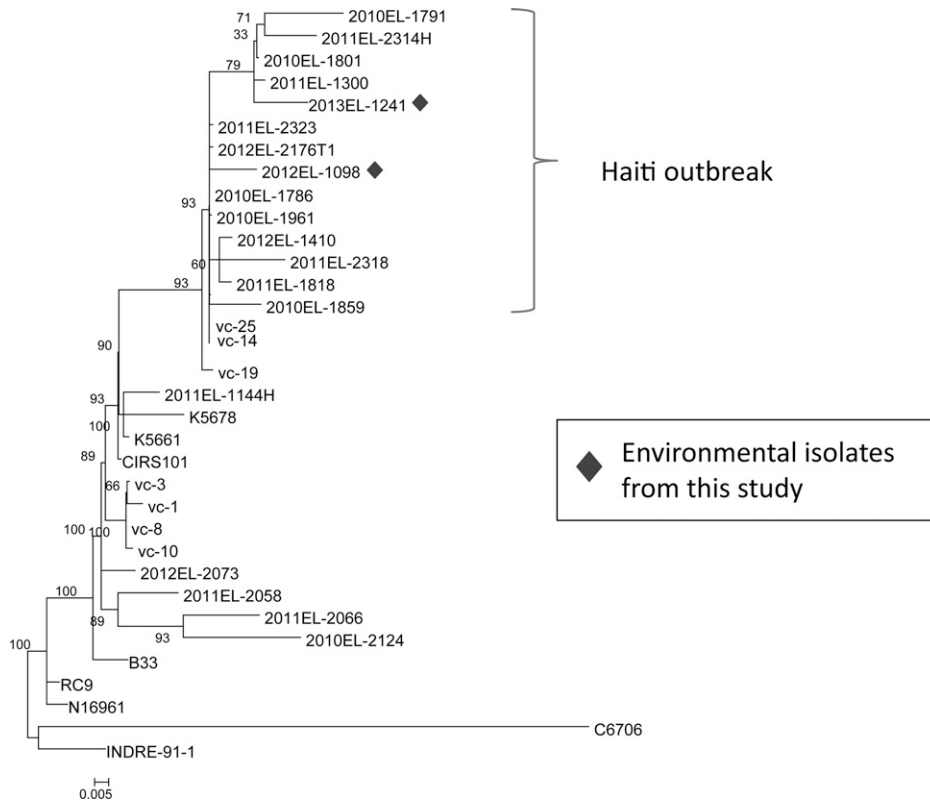

FIGURE S1. Core-gene maximum likelihood phylogenetic tree showing the relationship of Haiti environmental *Vibrio cholerae* isolates (I) to several reference genomes and to the Haiti outbreak clone.<sup>30,31</sup>

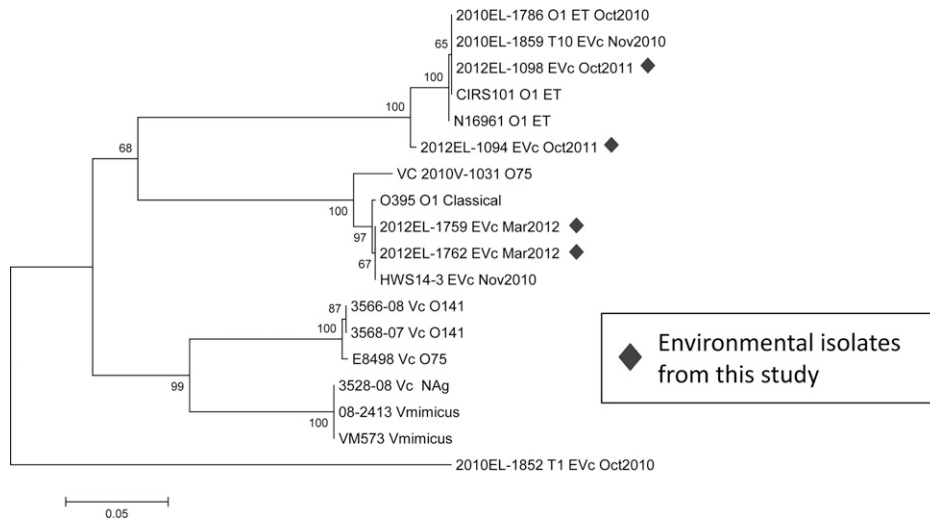

FIGURE S2. Environmental isolates from Haiti (I) in global *Vibrio cholerae-mimicus tcpA* phylogeny tree constructed using the Neighbor-Joining method with a statistical bootstrap test (500 replicates). The analysis involved 18 nucleotide sequences. There were a total of 675 positions in the final data set. Phylogeny constructed in MEGA5. ET = El Tor; EVc = environmental *Vibrio cholerae*; Nag = non-agglutinating in O1, O139, O75, and O141 antisera.

SUPPLEMENTAL TABLE S1  
Real-time PCR primers and probes used in this study

| Name                                   | Sequence                                      |
|----------------------------------------|-----------------------------------------------|
| <i>ctxA</i> Fwd                        | 5'-AGGGAAGAGCCGTGGAT-3'                       |
| <i>ctxA</i> Rvs                        | 5'-ACTTTGGGTTTTTTCATCGCAAG-3'                 |
| <i>ctxA</i> Probe                      | 5'-FAM-CATCATGCACCGCCGGTTGTG-BHQ1-3'          |
| <i>ompW</i> Fwd                        | 5'-CGCTTGGCTATATGTTTACTGACA-3'                |
| <i>ompW</i> Rvs                        | 5'-CACCACCAGAGGTAGAAATCTTAT-3'                |
| <i>ompW</i> Probe                      | 5'-Cy5-CATCAGTTTTGAAGTCCTCGCTGCTACGC-BHQ3-3'  |
| <i>tcpA</i> <sub>EI Tor</sub> Fwd      | 5'- TTGGTCAGCCTTGGTAAGGTT 3'                  |
| <i>tcpA</i> <sub>EI Tor</sub> Rvs      | 5'- GCAGAGTTTCGTGGAAATGAGA -3'                |
| <i>tcpA</i> <sub>EI Tor</sub> Probe    | 5'-Cy5- TCAGCTGATGAGGCAAAGAATCCTTTCA -BHQ3-3' |
| <i>tcpA</i> <sub>Classical</sub> Fwd   | 5'- CGCAGTAGCACTTGCAGATCTAG -3'               |
| <i>tcpA</i> <sub>Classical</sub> Rvs   | 5'- AGCGGGAGCGATAGATTTGATC -3'                |
| <i>tcpA</i> <sub>Classical</sub> Probe | 5'-FAM- TTGAGAATTCTGCAGCAGCGGCT -BHQ1-3'      |
